# Supplementary material for: Molecular characterization of a new SARS-CoV-2 recombinant cluster XAG identified in Brazil
Source: PubMed Central journal article supplement (PMC9554242; doi:10.3389/fmed.2022.1008600), 2022-09-28
Supplement: Table_1.pdf [file Table_1.pdf]

| Region       | Aminoacid change | BA.1   | BA.1.1 | BA.2   | BA.2.23 | XAG     |
|--------------|------------------|--------|--------|--------|---------|---------|
| ORF1a        | S135R            | < 0,1% | < 0,1% | 99,3%  | < 0,1%  | ND      |
|              | T842I            | < 0,1% | < 0,1% | 99,5%  | 97,6%   | ND      |
|              | K856R            | 96,9%  | 96,7%  | 0,1%   | 1,9%    | Present |
|              | G1307S           | < 0,1% | < 0,1% | 99,8%  | 99,7%   | ND      |
|              | L1774I *         | ND     | ND     | ND     | ND      | Present |
|              | S2083I           | 95,7%  | 95,5%  | < 0,1% | < 0,1%  | ND      |
|              | L2084I *         | ND     | ND     | ND     | ND      | Present |
|              | DEL2084/20284    | 95,7%  | 95,6%  | < 0,1% | < 0,1%  | ND      |
|              | A2710T           | 98,6%  | 99,0%  | ND     | ND      | ND      |
|              | L3027F           | < 0,1% | 0,1%   | 99,0%  | 99,6%   | Present |
|              | T3090I           | < 0,1% | 0,1%   | 98,5%  | 99,4%   | Present |
|              | L3201F           | < 0,1% | < 0,1% | 96,4%  | 98,1%   | Present |
|              | T3255I           | 98,2%  | 99,0%  | 99,6%  | 99,6%   | Present |
|              | P3395H           | 97,6%  | 97,5%  | 99,8%  | 99,8%   | Present |
|              | DEL3674/3676     | 95,0%  | 95,4%  | < 0,1% | < 0,1%  | ND      |
| DEL3675/3677 | < 0,1%           | < 0,1% | 97,6%  | 97,7%  | ND      |         |
| ORF1b        | I3758V           | 98,9%  | 99,5%  | 0,8%   | 0,2%    | ND      |
|              | P314L            | 98,6%  | 99,2%  | 99,8%  | 99,7%   | Present |
|              | R1315C           | < 0,1% | 0,2%   | 99,9%  | 99,7%   | Present |
|              | I1566V           | 93,7%  | 96,1%  | 97,9%  | 97,9%   | Present |
|              | T2163I           | < 0,1% | 0,1%   | 93,5%  | 90,0%   | Present |
| SPIKE        | T19L             | < 0,1% | < 0,1% | 98,8%  | 99,0%   | ND      |
|              | L24S             | < 0,1% | < 0,1% | 94,8%  | 97,9%   | ND      |
|              | A27S *           | ND     | ND     | ND     | ND      | Present |
|              | DEL25/27         | < 0,1% | < 0,1% | 94,9%  | 98,0%   | ND      |
|              | A67V             | 96,4%  | 96,0%  | < 0,1% | < 0,1%  | ND      |
|              | DEL69/70         | 95,1%  | 95,0%  | 1,4%   | 0,1%    | ND      |
|              | T95I             | 93,8%  | 94,9%  | < 0,1% | < 0,1%  | ND      |
|              | G142D            | 93,6%  | 92,8%  | 97,7%  | 99,3%   | Present |
|              | DEL143/145       | 93,6%  | 92,8%  | < 0,1% | ND      | ND      |
|              | N211I            | 84,0%  | 87,3%  | 0,1%   | < 0,1%  | ND      |
|              | DEL212/212       | 84,6%  | 87,5%  | 0,1%   | < 0,1%  | ND      |
|              | V213G            | 0,1%   | < 0,1% | 99,0%  | 99,6%   | Present |
|              | G339D            | 91,2%  | 93,4%  | 97,3%  | 99,0%   | Present |
|              | R346K            | 7,4%   | 92,3%  | < 0,1% | < 0,1%  | ND      |
|              | S371L            | 81,8%  | 87,8%  | < 0,1% | < 0,1%  | ND      |
|              | S371F            | 0,4%   | 0,1%   | 95,7%  | 98,1%   | Present |
|              | S373P            | 82,9%  | 88,4%  | 97,5%  | 99,3%   | Present |
|              | S375F            | 82,8%  | 88,2%  | 97,4%  | 99,3%   | Present |
|              | T376A            | 0,3%   | < 0,1% | 96,6%  | 99,2%   | Present |
|              | D405N            | 0,3%   | < 0,1% | 98,3%  | 99,7%   | Present |
|              | R408S            | 0,3%   | < 0,1% | 94,0%  | 95,3%   | Present |
|              | K417N            | 61,4%  | 70,4%  | 94,3%  | 97,8%   | Present |
|              | N440K            | 63,6%  | 74,9%  | 85,7%  | 96,9%   | Present |
|              | G446S            | 65,2%  | 76,2%  | < 0,1% | < 0,1%  | Present |
|              | S477N            | 85,2%  | 91,0%  | 93,7%  | 99,2%   | Present |
|              | T478K            | 85,4%  | 91,1%  | 93,8%  | 99,2%   | Present |
|              | E484A            | 85,0%  | 91,2%  | 93,7%  | 99,2%   | Present |
|              | Q493R            | 84,6%  | 91,8%  | 92,7%  | 99,1%   | Present |
|              | G496S            | 81,3%  | 89,5%  | < 0,1% | < 0,1%  | ND      |
|              | Q498R            | 81,1%  | 89,2%  | 91,6%  | 98,9%   | Present |
|              | N501Y            | 81,6%  | 89,7%  | 91,9%  | 98,9%   | Present |
|              | Y505H            | 82,0%  | 89,3%  | 91,7%  | 98,9%   | Present |
|              | T547K            | 98,4%  | 99,1%  | 0,1%   | < 0,1%  | ND      |
|              | D614G            | 98,9%  | 99,4%  | 99,9%  | 99,7%   | Present |
|              | H655Y            | 98,6%  | 99,3%  | 99,8%  | 99,6%   | Present |
| N679K        | 98,6%            | 99,3%  | 99,8%  | 99,6%  | Present |         |
| P681H        | 98,2%            | 99,1%  | 99,4%  | 99,6%  | Present |         |
| N764K        | 86,4%            | 91,8%  | 97,1%  | 98,1%  | Present |         |
| D796Y        | 96,3%            | 97,8%  | 99,3%  | 99,1%  | Present |         |
| N856K        | 97,5%            | 98,7%  | < 0,1% | ND     | ND      |         |
| Q954H        | 97,5%            | 98,5%  | 99,7%  | 99,0%  | Present |         |
| N969K        | 97,9%            | 99,0%  | 99,7%  | 99,1%  | Present |         |
| L981F        | 97,7%            | 98,8%  | ND     | < 0,1% | ND      |         |
| ORF3a        | T223I            | 0,1%   | 0,2%   | 99,8%  | 99,7%   | Present |
| E            | T9I              | 98,1%  | 98,9%  | 99,2%  | 99,1%   | Present |
| M            | D3G              | 90,4%  | 92,3%  | 0,2%   | ND      | ND      |
|              | Q19E             | 94,2%  | 96,1%  | 93,6%  | 97,8%   | Present |
| ORF6         | A63T             | 96,1%  | 97,1%  | 99,3%  | 99,4%   | Present |
|              | D61L             | < 0,1% | 0,6%   | 96,4%  | 98,7%   | Present |
| ORF8         | S84L             | 95,8%  | 97,0%  | 97,7%  | 97,8%   | ND      |
| N            | P13L             | 96,1%  | 97,0%  | 98,8%  | 98,3%   | Present |
|              | DEL31/33         | 93,6%  | 94,4%  | 96,0%  | 95,9%   | ND      |
|              | R203K            | 96,5%  | 98,1%  | 97,0%  | 99,0%   | Present |
|              | G204R            | 96,7%  | 98,4%  | 97,1%  | 99,0%   | Present |
|              | S413R            | < 0,1% | < 0,1% | 98,0%  | 98,7%   | Present |
| ORF9b        | P10S *           | ND     | ND     | ND     | ND      | Present |

**Supplementary table 1.** Genetic signature of BA.1, BA.1.1, BA.2, BA.2.23 lineages and XAG recombinant. Values in parentheses represent mutation frequencies according to outbreak.info (45). ND: Not detected; \* Mutations present only in recombinant XAG.
